# Supplementary material
Source: publisher figshare collection journal article supplement (https://gsajournals.figshare.com/ndownloader/files/20276256)
Supplement: Supplementary file 1 [file 20276256]

## Sheet: Group I
FileS2.1: GO terms
Group I: 17 GO terms were enriched in upregulated genes in Mop1 wildtype in response to ABA (agriGOv2)
GO term	Description	Number of DEGs	Number in BG/Ref	p-value	FDR
GO:0050896	response to stimulus	329	22704	2.6e-09	4.1e-08
GO:0006950	response to stress	213	12007	2.8e-12	6e-11
GO:0051179	localization	180	12018	9.4e-05	0.00066
GO:0051234	establishment of localization	157	10218	0.0001	0.00066
GO:0006810	transport	151	9455	2.1e-05	0.00017
GO:0007154	cell communication	136	7931	1.8e-06	1.9e-05
GO:0009628	response to abiotic stimulus	134	5674	1.2e-15	3.9e-14
GO:0009719	response to endogenous stimulus	125	4462	3.5e-20	2.3e-18
GO:0007165	signal transduction	125	7006	7.7e-07	9.9e-06
GO:0009605	response to external stimulus	83	4265	4.3e-06	3.9e-05
GO:0051704	multi-organism process	79	4833	0.0018	0.0096
GO:0009791	post-embryonic development	70	4254	0.0029	0.013
GO:0006629	lipid metabolic process	67	4009	0.0025	0.012
GO:0009607	response to biotic stimulus	60	3201	0.00029	0.0017
GO:0048608	reproductive structure development	52	3139	0.0089	0.033
GO:0008219	cell death	28	1410	0.006	0.024
GO:0009991	response to extracellular stimulus	18	740	0.0038	0.016

## Sheet: Group II
FileS2.2: GO terms
Group II: 11 GO terms were enriched in downregulated genes in Mop1 wildtype in response to ABA (agriGOv2)
GO term	Description	Number of DEGs	Number in BG/Ref	p-value	FDR
GO:0050896	response to stimulus	211	22704	3.4e-06	7e-05
GO:0009628	response to abiotic stimulus	71	5674	1.4e-05	0.00014
GO:0009719	response to endogenous stimulus	69	4462	8.8e-09	2.7e-07
GO:0009056	catabolic process	66	6365	0.0049	0.034
GO:0051704	multi-organism process	64	4833	7.3e-06	9.1e-05
GO:0009605	response to external stimulus	55	4265	7.6e-05	0.00067
GO:0009653	anatomical structure morphogenesis	51	4749	0.0074	0.042
GO:0009607	response to biotic stimulus	48	3201	5.8e-06	8.9e-05
GO:0009791	post-embryonic development	47	4254	0.0061	0.038
GO:0019748	secondary metabolic process	42	1706	3.9e-11	2.4e-09
GO:0019725	cellular homeostasis	16	982	0.0041	0.032

## Sheet: Group V
FileS2.3: GO terms
Group V: 22 GO terms were enriched in upregulated genes in mop1-1 mutant in response to ABA (agriGOv2)
GO term	Description	Number of DEGs	Number in BG/Ref	p-value	FDR
GO:0050896	response to stimulus	636	22704	9.6e-19	1.6e-17
GO:0050794	regulation of cellular process	477	19579	0.0058	0.021
GO:0006950	response to stress	408	12007	2.2e-22	5e-21
GO:0051179	localization	318	12018	0.00029	0.0012
GO:0007275	multicellular organism development	313	12465	0.0092	0.029
GO:0051234	establishment of localization	277	10218	0.0002	0.00088
GO:0006810	transport	269	9455	8.4e-06	4.7e-05
GO:0009628	response to abiotic stimulus	258	5674	5.4e-29	1.8e-27
GO:0007154	cell communication	255	7931	5.5e-10	5.7e-09
GO:0009719	response to endogenous stimulus	237	4462	6e-36	4e-34
GO:0007165	signal transduction	231	7006	6e-10	5.7e-09
GO:0009605	response to external stimulus	169	4265	4.5e-13	6e-12
GO:0009056	catabolic process	168	6365	0.014	0.041
GO:0051704	multi-organism process	160	4833	4.6e-07	3.1e-06
GO:0006629	lipid metabolic process	126	4009	9.2e-05	0.00048
GO:0009607	response to biotic stimulus	124	3201	3.9e-09	3.2e-08
GO:0009791	post-embryonic development	120	4254	0.0059	0.021
GO:0048608	reproductive structure development	91	3139	0.0083	0.028
GO:0019748	secondary metabolic process	69	1706	3.7e-06	2.2e-05
GO:0008219	cell death	64	1410	2.2e-07	1.6e-06
GO:0019725	cellular homeostasis	39	982	0.00066	0.0026
GO:0009991	response to extracellular stimulus	34	740	0.00012	0.00058

## Sheet: Group VI
FileS2.4: GO terms
Group VI: 28 GO terms were enriched in downregulated genes in mop1-1 mutant in response to ABA (agriGOv2)
GO term	Description	Number of DEGs	Number in BG/Ref	p-value	FDR
GO:0050896	response to stimulus	603	22704	1.5e-10	2.7e-09
GO:0032502	developmental process	423	16379	0.00013	0.00059
GO:0048856	anatomical structure development	384	13917	6.3e-07	3.7e-06
GO:0007275	multicellular organism development	332	12465	0.00015	0.00062
GO:0006950	response to stress	312	12007	0.0015	0.0053
GO:0009628	response to abiotic stimulus	198	5674	2.6e-10	3.5e-09
GO:0009056	catabolic process	194	6365	6.2e-06	3.1e-05
GO:0009653	anatomical structure morphogenesis	177	4749	2.2e-11	5.1e-10
GO:0051704	multi-organism process	170	4833	4.1e-09	3.2e-08
GO:0009719	response to endogenous stimulus	162	4462	1.2e-09	1.1e-08
GO:0009605	response to external stimulus	159	4265	3e-10	3.5e-09
GO:0000003	reproduction	150	5342	0.0028	0.0084
GO:0009791	post-embryonic development	148	4254	1e-07	6.4e-07
GO:0006629	lipid metabolic process	147	4009	4.7e-09	3.3e-08
GO:0005975	carbohydrate metabolic process	139	4161	2.3e-06	1.2e-05
GO:0009607	response to biotic stimulus	136	3201	1.8e-12	6.2e-11
GO:0022414	reproductive process	134	4935	0.013	0.035
GO:0048869	cellular developmental process	132	4685	0.0045	0.013
GO:0003006	developmental process involved in reproduction	113	3998	0.0078	0.021
GO:0030154	cell differentiation	104	3301	0.00041	0.0016
GO:0040007	growth	93	2046	3.5e-10	3.5e-09
GO:0048608	reproductive structure development	93	3139	0.0048	0.013
GO:0019748	secondary metabolic process	90	1706	4e-13	2.8e-11
GO:0009908	flower development	59	1657	0.00053	0.002
GO:0016049	cell growth	58	1386	9.5e-06	4.4e-05
GO:0008219	cell death	49	1410	0.0025	0.0078
GO:0015979	photosynthesis	25	585	0.0025	0.0078
GO:0032535	regulation of cellular component size	16	392	0.02	0.049
